# Supplementary material for: Efficacy of Adjunctive Antiseptic Lavage Solution in Managing Acute Hip/Knee Prosthetic Joint Infection: A Comparative Study in a Tertiary Revision Center
Source: PubMed Central journal article supplement (PMC11794171; doi:10.1016/j.artd.2024.101593), 2025-01-21
Supplement: mmc3.pdf [file mmc3.pdf]

# INDIVIDUAL CONFLICT OF INTEREST STATEMENT

*American Association of Hip and Knee Surgeons*  
(Adopted from the American Academy of Orthopaedic Surgeons disclosure statement)

The following form **must be filled out completely and submitted by each author (example, 6 authors, 6 forms).**  
**All items require a response. If there is no relevant disclosure for a given item, enter "None."**

**Manuscript Title: Efficacy of Adjunctive Antiseptic Lavage Solution in Managing Acute Hip/Knee Prosthetic Joint Infection: Comparative Study in a Tertiary Revision Centre**

1. Royalties from a company or supplier (The following conflicts were disclosed) - NONE
2. Speakers bureau/paid presentations for a company or supplier (The following conflicts were disclosed) NONE
- 3A. Paid employee for a company or supplier (The following conflicts were disclosed) NONE
- 3B. Paid consultant for a company or supplier (The following conflicts were disclosed) NONE
- 3C. Unpaid consultants for a company or supplier (The following conflicts were disclosed) NONE
4. Stock or stock options in a company or supplier (The following conflicts were disclosed) NONE
5. Research support from a company or supplier as a Principal Investigator (The following conflicts were disclosed) NONE
6. Other financial or material support from a company or supplier (The following conflicts were disclosed) NONE
7. Royalties, financial or material support from publishers (The following conflicts were disclosed) NONE
8. Medical/Orthopaedic publications editorial/governing board (The following conflicts were disclosed) NONE
9. Board member/committee appointments for a society (The following conflicts were disclosed) NONE

**Each author must sign AND print or type his/her name, date and submit a separate form**

In addition, one BLINDED Conflict of Interest form (no author names used) should be submitted per manuscript with all author disclosures.

JONATHAN QUINN

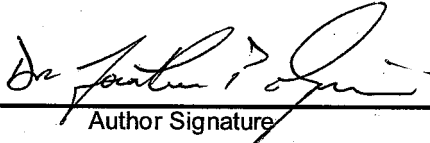

24/09/2024

Author Name (Print or Type)

Author Signature

Date
